# Supplementary material for: Food Deprivation Affects the miRNome in the Lactating Goat Mammary Gland
Source: PLoS One. 2015 Oct 16;10(10):e0140111. doi: 10.1371/journal.pone.0140111 (PMC4608672; doi:10.1371/journal.pone.0140111)
Supplement: S3 Table — (XLSX) [file pone.0140111.s006.xlsx]

## Sheet: Feuil1
miRNA	Targeted gene	Function
Factors inhibiting involution and/or cell death
miR-188-5p	AKT	Serine/threonine kinase
miR-409-3p
chr22_29775-3p
miR-660-5p	BCL2	Apoptosis regulator
miR-409-3p	IGF-I	Growth factor
miR-6119-5p
chr22_29775-3p
miR-6119-5p	IGF-II	Growth factor
Factors promoting involution and/or cell death
let-7c-5p	CASP3	Caspase
miR-223-5p
miR-6119-5p
miR-140-3p	STAT3	Transcription factor
mir-196a-5p
miR-6119-5p	CEBPδ	Transcription factor
miR-188-5p	PTEN	Lipid phosphatase
miR-222-3p
miR-494-3p
miR-541-5p
chr3_3319-5p
miR-6119-5p	IL-6	Cytokine
miR-140-3p	LIF	Cytokine
miR-223-3p
miR-494-3p
let-7c-5p	IL-10	Cytokine
miR-6119-5p
miR-671-5p	SMAD3	TGF-β signalling mediator
miR-671-5p	IGFBP-5	IGF inhibitor
let-7c-5p	MNT	Transcriptionnal repressor
miR-140-3p
miR-6119-5p
chr9_13534-5p
chr19_26739-5p
Marker of autophagy
miR-223-3p	ATG7	Ubiquitin-like modifier
miR-188-5p	MAP1LC3B2	Autophagosome formation
